# Supplementary material for: Mining TCGA database for gene expression in ovarian serous cystadenocarcinoma microenvironment
Source: PeerJ. 2021 May 4;9:e11375. doi: 10.7717/peerj.11375 (PMC8103916; doi:10.7717/peerj.11375)
Supplement: Supplemental Information 2 — Results of GO and KEGG pathway analysis of DEGs. The enriched GO terms were divided into MF, CC and BP ontologies. Top GO terms identified include glycosaminoglycan binding, immune response and extracellular space. DEGs were mainly enriched in staphylococcus aureus infection and complement and coagulation cascades according to the results of KEGG pathway analysis. [file peerj-09-11375-s002.csv]

source	term_name	term_id	adjusted_p_value	negative_log10_of_adjusted_p_value	term_size	query_size	intersection_size	effective_domain_size	intersections
GO:MF	glycosaminoglycan binding	GO:0005539	0.0000015983561765507384	5.796326436364779	226	76	11	17516	CXCL10,DCN,VCAN,COL11A1,IGHM,EPYC,SULF1,THBS2,GPNMB,POSTN,PTPRC
GO:MF	extracellular matrix structural constituent	GO:0005201	0.00001019847452639196	4.991464784543578	155	76	9	17516	DCN,VCAN,COL11A1,LUM,COL5A2,TGFBI,THBS2,POSTN,COL10A1
GO:MF	serine-type endopeptidase activity	GO:0004252	0.0005557198884381227	3.2551440601439574	248	76	9	17516	C1QA,PLAU,C1S,IGLV3-25,FAP,IGKV1-5,C1QB,CTSK,MMP9
GO:MF	chemokine activity	GO:0008009	0.000995863388542078	3.001800233535678	49	76	5	17516	CXCL10,CCL5,CXCL9,CCL2,CCL4
GO:MF	antigen binding	GO:0003823	0.0010573207164184726	2.975793258440927	199	76	8	17516	IL7R,HLA-DPB1,IGHM,HLA-DRA,HLA-DPA1,IGLV3-25,IGKV1-5,CD48
GO:MF	serine-type peptidase activity	GO:0008236	0.0011200468380679221	2.950763815643108	270	76	9	17516	C1QA,PLAU,C1S,IGLV3-25,FAP,IGKV1-5,C1QB,CTSK,MMP9
GO:MF	serine hydrolase activity	GO:0017171	0.0013017044365955235	2.8854876149439574	275	76	9	17516	C1QA,PLAU,C1S,IGLV3-25,FAP,IGKV1-5,C1QB,CTSK,MMP9
GO:MF	MHC class II receptor activity	GO:0032395	0.0029150551187592474	2.53535322905362	9	76	3	17516	HLA-DRA,HLA-DPA1,HLA-DQA1
GO:MF	IgG binding	GO:0019864	0.004151358418172978	2.3818097690751223	10	76	3	17516	FCGR2A,FCGR2B,FCER1G
GO:MF	chemokine receptor binding	GO:0042379	0.004406978350383892	2.3558590829894923	66	76	5	17516	CXCL10,CCL5,CXCL9,CCL2,CCL4
GO:MF	collagen binding	GO:0005518	0.005105776164534816	2.291938228434665	68	76	5	17516	DCN,LUM,TGFBI,CTSK,MMP9
GO:MF	protein-containing complex binding	GO:0044877	0.02114375797023732	1.6748178211586005	1070	76	15	17516	DCN,VCAM1,LUM,FCGR2A,ITGB2,HLA-DRA,UBD,FAP,TGFBI,GPNMB,FCGR2B,CTSK,HCLS1,MMP9,FCER1G
GO:MF	endopeptidase activity	GO:0004175	0.030261137399622422	1.5191147525489037	509	76	10	17516	C1QA,PLAU,C1S,IGLV3-25,FAP,IGKV1-5,C1QB,ADAMDEC1,CTSK,MMP9
GO:MF	heparin binding	GO:0008201	0.03180557926942949	1.4974966902862912	161	76	6	17516	CXCL10,COL11A1,THBS2,GPNMB,POSTN,PTPRC
GO:BP	immune response	GO:0006955	3.735460138485183e-18	17.427655893635322	2185	81	46	17622	IL7R,VSIG4,CXCL10,CLEC2B,C1QA,FGL2,VCAM1,PLAU,C3AR1,SAMSN1,CCL5,HLA-DPB1,C1S,IGHM,FCGR2A,ITGB2,TYROBP,HLA-DRA,GLIPR1,UBD,HLA-DPA1,EBI2,CXCL9,IGLV3-25,LY86,RNASE6,LYZ,RAB31,FCGR2B,IGKV1-5,CD53,LY96,CCL2,SERPINA1,C1QB,HLA-DQA1,ADAMDEC1,HLA-DQB1,CD48,MNDA,RGS1,CCL4,MMP9,FCER1G,PTPRC,CD14
GO:BP	immune system process	GO:0002376	2.2733053761910376e-17	16.643342220990142	3072	81	52	17622	IL7R,VSIG4,CXCL10,CLEC2B,C1QA,FGL2,VCAM1,PLAU,C3AR1,SAMSN1,CCL5,HLA-DPB1,C1S,IGHM,FCGR2A,ITGB2,TYROBP,HLA-DRA,GLIPR1,EVI2B,UBD,HLA-DPA1,EBI2,CXCL9,IGLV3-25,LY86,RNASE6,LYZ,GPNMB,RAB31,FCGR2B,IGKV1-5,CD53,LY96,CCL2,SERPINA1,C1QB,HLA-DQA1,ADAMDEC1,TMEM176B,HLA-DQB1,CD2,TMEM176A,CD48,MNDA,RGS1,HCLS1,CCL4,MMP9,FCER1G,PTPRC,CD14
GO:BP	regulation of immune system process	GO:0002682	3.3956488215199796e-15	14.469077230902267	1535	81	37	17622	IL7R,VSIG4,CXCL10,CLEC2B,C1QA,VCAM1,C3AR1,SAMSN1,CCL5,HLA-DPB1,C1S,IGHM,FCGR2A,ITGB2,TYROBP,HLA-DRA,EVI2B,HLA-DPA1,EBI2,IGLV3-25,GPNMB,FCGR2B,IGKV1-5,LY96,CCL2,C1QB,HLA-DQA1,TMEM176B,CD2,TMEM176A,CD48,MNDA,HCLS1,CCL4,FCER1G,PTPRC,CD14
GO:BP	positive regulation of immune system process	GO:0002684	5.774962920365951e-13	12.238450799926234	1089	81	30	17622	IL7R,VSIG4,CXCL10,C1QA,VCAM1,C3AR1,CCL5,HLA-DPB1,C1S,IGHM,FCGR2A,ITGB2,HLA-DRA,EVI2B,HLA-DPA1,EBI2,IGLV3-25,FCGR2B,IGKV1-5,LY96,CCL2,C1QB,HLA-DQA1,CD2,MNDA,HCLS1,CCL4,FCER1G,PTPRC,CD14
GO:BP	defense response	GO:0006952	6.51791300191406e-12	11.18589144059392	1596	81	34	17622	VSIG4,CXCL10,C1QA,CD163,VCAM1,C3AR1,CCL5,HLA-DPB1,C1S,IGHM,ITGB2,TYROBP,HLA-DRA,UBD,HLA-DPA1,CXCL9,LY86,RNASE6,SERPINF1,LYZ,FCGR2B,LY96,CCL2,ALOX5AP,SERPINA1,C1QB,HLA-DQA1,CD48,MNDA,CCL4,MMP9,FCER1G,PTPRC,CD14
GO:BP	regulation of immune response	GO:0050776	5.7666035456615484e-11	10.239079905334378	1009	81	27	17622	IL7R,VSIG4,CLEC2B,C1QA,VCAM1,C3AR1,SAMSN1,CCL5,HLA-DPB1,C1S,IGHM,FCGR2A,ITGB2,TYROBP,HLA-DRA,HLA-DPA1,IGLV3-25,FCGR2B,IGKV1-5,LY96,C1QB,HLA-DQA1,CD48,MNDA,FCER1G,PTPRC,CD14
GO:BP	immune effector process	GO:0002252	1.6862031298988092e-10	9.77309010890445	1246	81	29	17622	IL7R,VSIG4,CXCL10,C1QA,FGL2,PLAU,C3AR1,C1S,IGHM,FCGR2A,ITGB2,TYROBP,GLIPR1,EBI2,CXCL9,IGLV3-25,RNASE6,LYZ,RAB31,FCGR2B,IGKV1-5,CD53,SERPINA1,C1QB,MNDA,MMP9,FCER1G,PTPRC,CD14
GO:BP	leukocyte activation	GO:0045321	2.287950289595968e-10	9.640553415713233	1261	81	29	17622	IL7R,FGL2,VCAM1,PLAU,C3AR1,SAMSN1,CCL5,HLA-DPB1,IGHM,FCGR2A,ITGB2,TYROBP,GLIPR1,UBD,HLA-DPA1,EBI2,LYZ,GPNMB,RAB31,FCGR2B,CD53,CCL2,SERPINA1,CD2,MNDA,MMP9,FCER1G,PTPRC,CD14
GO:BP	cell activation	GO:0001775	5.720902605537383e-10	9.242535445738566	1411	81	30	17622	IL7R,CXCL10,FGL2,VCAM1,PLAU,C3AR1,SAMSN1,CCL5,HLA-DPB1,IGHM,FCGR2A,ITGB2,TYROBP,GLIPR1,UBD,HLA-DPA1,EBI2,LYZ,GPNMB,RAB31,FCGR2B,CD53,CCL2,SERPINA1,CD2,MNDA,MMP9,FCER1G,PTPRC,CD14
GO:BP	leukocyte mediated immunity	GO:0002443	1.1206550110998785e-9	8.950528062547795	867	81	24	17622	IL7R,C1QA,FGL2,PLAU,C3AR1,C1S,IGHM,FCGR2A,ITGB2,TYROBP,GLIPR1,IGLV3-25,LYZ,RAB31,FCGR2B,IGKV1-5,CD53,SERPINA1,C1QB,MNDA,MMP9,FCER1G,PTPRC,CD14
GO:BP	humoral immune response	GO:0006959	1.2031075483667822e-9	8.919695548408685	360	81	17	17622	VSIG4,CXCL10,C1QA,C3AR1,C1S,IGHM,EBI2,CXCL9,IGLV3-25,LY86,RNASE6,LYZ,FCGR2B,IGKV1-5,CCL2,C1QB,PTPRC
GO:BP	myeloid leukocyte activation	GO:0002274	1.4466265498591476e-8	7.8396435685825265	635	81	20	17622	FGL2,PLAU,C3AR1,CCL5,FCGR2A,ITGB2,TYROBP,GLIPR1,UBD,LYZ,RAB31,FCGR2B,CD53,SERPINA1,CD2,MNDA,MMP9,FCER1G,PTPRC,CD14
GO:BP	activation of immune response	GO:0002253	1.7156121735436297e-8	7.76558088077986	641	81	20	17622	VSIG4,C1QA,C3AR1,HLA-DPB1,C1S,IGHM,FCGR2A,ITGB2,HLA-DRA,HLA-DPA1,IGLV3-25,FCGR2B,IGKV1-5,LY96,C1QB,HLA-DQA1,MNDA,FCER1G,PTPRC,CD14
GO:BP	neutrophil activation	GO:0042119	1.9132118430200536e-8	7.718236939454715	496	81	18	17622	FGL2,PLAU,C3AR1,CCL5,FCGR2A,ITGB2,TYROBP,GLIPR1,LYZ,RAB31,FCGR2B,CD53,SERPINA1,MNDA,MMP9,FCER1G,PTPRC,CD14
GO:BP	positive regulation of response to stimulus	GO:0048584	2.0670522175143537e-8	7.684648552162311	2368	81	36	17622	IL7R,SFRP4,VSIG4,CXCL10,C1QA,DCN,C3AR1,CCL5,HLA-DPB1,C1S,IGHM,FCGR2A,ITGB2,HLA-DRA,SULF1,UBD,HLA-DPA1,EBI2,CXCL9,IGLV3-25,LY86,GPNMB,FCGR2B,IGKV1-5,LY96,CCL2,ALOX5AP,C1QB,HLA-DQA1,MNDA,HCLS1,CCL4,MMP9,FCER1G,PTPRC,CD14
GO:BP	granulocyte activation	GO:0036230	2.4136837547760422e-8	7.617319632562117	503	81	18	17622	FGL2,PLAU,C3AR1,CCL5,FCGR2A,ITGB2,TYROBP,GLIPR1,LYZ,RAB31,FCGR2B,CD53,SERPINA1,MNDA,MMP9,FCER1G,PTPRC,CD14
GO:BP	inflammatory response	GO:0006954	5.5338959626116114e-8	7.2569690098659025	684	81	20	17622	CXCL10,CD163,VCAM1,C3AR1,CCL5,ITGB2,CXCL9,LY86,SERPINF1,LYZ,FCGR2B,LY96,CCL2,ALOX5AP,SERPINA1,CCL4,MMP9,FCER1G,PTPRC,CD14
GO:BP	regulation of response to stimulus	GO:0048583	1.3178237214525155e-7	6.880142679211302	4226	81	47	17622	IL7R,SFRP4,VSIG4,CXCL10,CLEC2B,C1QA,DCN,VCAM1,PLAU,C3AR1,SAMSN1,CCL5,HLA-DPB1,C1S,IGHM,FCGR2A,ITGB2,TYROBP,HLA-DRA,SULF1,UBD,HLA-DPA1,EBI2,CXCL9,IGLV3-25,LY86,FAP,SERPINF1,GPNMB,FCGR2B,IGKV1-5,LY96,CCL2,ALOX5AP,POSTN,C1QB,HLA-DQA1,CD48,MNDA,RGS1,HCLS1,CCL4,MMP9,FCER1G,PTPRC,CD14,ARHGDIB
GO:BP	innate immune response	GO:0045087	1.3274817554544855e-7	6.876971439029838	895	81	22	17622	VSIG4,C1QA,VCAM1,CCL5,HLA-DPB1,C1S,IGHM,ITGB2,TYROBP,HLA-DRA,UBD,HLA-DPA1,LY86,RNASE6,FCGR2B,LY96,CCL2,C1QB,HLA-DQA1,CCL4,FCER1G,CD14
GO:BP	positive regulation of immune response	GO:0050778	1.5000629269102666e-7	6.823890522119873	810	81	21	17622	VSIG4,C1QA,C3AR1,CCL5,HLA-DPB1,C1S,IGHM,FCGR2A,ITGB2,HLA-DRA,HLA-DPA1,IGLV3-25,FCGR2B,IGKV1-5,LY96,C1QB,HLA-DQA1,MNDA,FCER1G,PTPRC,CD14
GO:BP	response to stimulus	GO:0050896	4.642929540896557e-7	6.33320790695024	9093	81	69	17622	IL7R,SFRP4,VSIG4,CXCL10,CLEC2B,C1QA,DCN,IL10RA,COL11A1,FGL2,SRGN,CD163,VCAM1,PLAU,C3AR1,SAMSN1,CCL5,HLA-DPB1,LUM,C1S,IGHM,FCGR2A,ITGB2,TYROBP,HLA-DRA,GLIPR1,SULF1,UBD,HLA-DPA1,EBI2,CXCL9,IGLV3-25,LY86,F13A1,COL5A2,FAP,TGFBI,RNASE6,SERPINF1,LYZ,GPNMB,RAB31,LAPTM5,FCGR2B,IGKV1-5,CD53,LY96,CCL2,NNMT,ALOX5AP,POSTN,SERPINA1,C1QB,HLA-DQA1,ADAMDEC1,GPX3,HLA-DQB1,CD2,CD48,MNDA,RGS1,HCLS1,CCL4,MMP9,FCER1G…
GO:BP	leukocyte degranulation	GO:0043299	5.231884817688858e-7	6.281341825768036	529	81	17	17622	FGL2,PLAU,C3AR1,FCGR2A,ITGB2,TYROBP,GLIPR1,LYZ,RAB31,FCGR2B,CD53,SERPINA1,MNDA,MMP9,FCER1G,PTPRC,CD14
GO:BP	myeloid leukocyte mediated immunity	GO:0002444	8.507043805219623e-7	6.070221330881923	546	81	17	17622	FGL2,PLAU,C3AR1,FCGR2A,ITGB2,TYROBP,GLIPR1,LYZ,RAB31,FCGR2B,CD53,SERPINA1,MNDA,MMP9,FCER1G,PTPRC,CD14
GO:BP	extracellular structure organization	GO:0043062	9.584360359660093e-7	6.0184368657321325	404	81	15	17622	DCN,VCAN,COL11A1,VCAM1,LUM,ITGB2,SULF1,COL5A2,FAP,TGFBI,POSTN,APOC1,CTSK,COL10A1,MMP9
GO:BP	leukocyte migration	GO:0050900	9.957555062417223e-7	6.001847283388346	476	81	16	17622	CXCL10,VCAM1,C3AR1,CCL5,IGHM,ITGB2,EBI2,CXCL9,IGLV3-25,IGKV1-5,CCL2,CD2,CD48,CCL4,MMP9,FCER1G
GO:BP	neutrophil degranulation	GO:0043312	0.000001231501484829339	5.909565060192885	483	81	16	17622	FGL2,PLAU,C3AR1,FCGR2A,ITGB2,TYROBP,GLIPR1,LYZ,RAB31,CD53,SERPINA1,MNDA,MMP9,FCER1G,PTPRC,CD14
GO:BP	neutrophil activation involved in immune response	GO:0002283	0.0000013474721796461201	5.870480192635399	486	81	16	17622	FGL2,PLAU,C3AR1,FCGR2A,ITGB2,TYROBP,GLIPR1,LYZ,RAB31,CD53,SERPINA1,MNDA,MMP9,FCER1G,PTPRC,CD14
GO:BP	extracellular matrix organization	GO:0030198	0.000001497211241190896	5.824716920825016	350	81	14	17622	DCN,VCAN,COL11A1,VCAM1,LUM,ITGB2,SULF1,COL5A2,FAP,TGFBI,POSTN,CTSK,COL10A1,MMP9
GO:BP	neutrophil mediated immunity	GO:0002446	0.000001864293992791261	5.7294855998258525	497	81	16	17622	FGL2,PLAU,C3AR1,FCGR2A,ITGB2,TYROBP,GLIPR1,LYZ,RAB31,CD53,SERPINA1,MNDA,MMP9,FCER1G,PTPRC,CD14
GO:BP	regulated exocytosis	GO:0045055	0.0000021409906599076128	5.669385227315292	750	81	19	17622	FGL2,SRGN,PLAU,C3AR1,FCGR2A,ITGB2,TYROBP,GLIPR1,F13A1,LYZ,RAB31,FCGR2B,CD53,SERPINA1,MNDA,MMP9,FCER1G,PTPRC,CD14
GO:BP	exocytosis	GO:0006887	0.0000033895191926027076	5.4698619026255075	864	81	20	17622	FGL2,SRGN,PLAU,C3AR1,CCL5,FCGR2A,ITGB2,TYROBP,GLIPR1,F13A1,LYZ,RAB31,FCGR2B,CD53,SERPINA1,MNDA,MMP9,FCER1G,PTPRC,CD14
GO:BP	leukocyte activation involved in immune response	GO:0002366	0.000004436716851838303	5.352938286768688	694	81	18	17622	FGL2,PLAU,C3AR1,FCGR2A,ITGB2,TYROBP,GLIPR1,EBI2,LYZ,RAB31,FCGR2B,CD53,SERPINA1,MNDA,MMP9,FCER1G,PTPRC,CD14
GO:BP	cell activation involved in immune response	GO:0002263	0.000004858139528501838	5.313530016169788	698	81	18	17622	FGL2,PLAU,C3AR1,FCGR2A,ITGB2,TYROBP,GLIPR1,EBI2,LYZ,RAB31,FCGR2B,CD53,SERPINA1,MNDA,MMP9,FCER1G,PTPRC,CD14
GO:BP	myeloid cell activation involved in immune response	GO:0002275	0.000005837607639335878	5.233765098419216	538	81	16	17622	FGL2,PLAU,C3AR1,FCGR2A,ITGB2,TYROBP,GLIPR1,LYZ,RAB31,CD53,SERPINA1,MNDA,MMP9,FCER1G,PTPRC,CD14
GO:BP	response to cytokine	GO:0034097	0.000008387648158214186	5.076359795439752	1115	81	22	17622	IL7R,CXCL10,IL10RA,VCAM1,CCL5,HLA-DPB1,ITGB2,HLA-DRA,UBD,HLA-DPA1,CXCL9,F13A1,LAPTM5,CCL2,POSTN,HLA-DQA1,HCLS1,CCL4,MMP9,FCER1G,PTPRC,CD14
GO:BP	regulation of leukocyte activation	GO:0002694	0.000009339254083717497	5.029687809022773	556	81	16	17622	IL7R,VCAM1,SAMSN1,CCL5,HLA-DPB1,IGHM,ITGB2,HLA-DPA1,EBI2,GPNMB,FCGR2B,CCL2,CD2,MNDA,FCER1G,PTPRC
GO:BP	immune response-activating signal transduction	GO:0002757	0.000011158891392216986	4.9523789493194075	563	81	16	17622	C3AR1,HLA-DPB1,IGHM,FCGR2A,ITGB2,HLA-DRA,HLA-DPA1,IGLV3-25,FCGR2B,IGKV1-5,LY96,HLA-DQA1,MNDA,FCER1G,PTPRC,CD14
GO:BP	regulation of cell activation	GO:0050865	0.00002326708544503093	4.633258015270027	593	81	16	17622	IL7R,VCAM1,SAMSN1,CCL5,HLA-DPB1,IGHM,ITGB2,HLA-DPA1,EBI2,GPNMB,FCGR2B,CCL2,CD2,MNDA,FCER1G,PTPRC
GO:BP	immune response-regulating signaling pathway	GO:0002764	0.00002382612339148766	4.622946613408536	594	81	16	17622	C3AR1,HLA-DPB1,IGHM,FCGR2A,ITGB2,HLA-DRA,HLA-DPA1,IGLV3-25,FCGR2B,IGKV1-5,LY96,HLA-DQA1,MNDA,FCER1G,PTPRC,CD14
GO:BP	cell migration	GO:0016477	0.000026357947273636185	4.579088415111631	1533	81	25	17622	CXCL10,DCN,VCAM1,PLAU,C3AR1,CCL5,IGHM,ITGB2,SULF1,EBI2,CXCL9,IGLV3-25,FAP,SERPINF1,GPNMB,IGKV1-5,CCL2,POSTN,CD2,CD48,CCL4,MMP9,FCER1G,PTPRC,ARHGDIB
GO:BP	neutrophil chemotaxis	GO:0030593	0.00005568476501791363	4.254263608662544	103	81	8	17622	CXCL10,C3AR1,CCL5,ITGB2,CXCL9,CCL2,CCL4,FCER1G
GO:BP	cytokine-mediated signaling pathway	GO:0019221	0.00005851406607398785	4.232739722225288	724	81	17	17622	IL7R,CXCL10,IL10RA,VCAM1,CCL5,HLA-DPB1,ITGB2,HLA-DRA,HLA-DPA1,CXCL9,F13A1,CCL2,HLA-DQA1,CCL4,MMP9,FCER1G,PTPRC
GO:BP	cellular response to cytokine stimulus	GO:0071345	0.0000665993093084231	4.176530274810119	1030	81	20	17622	IL7R,CXCL10,IL10RA,VCAM1,CCL5,HLA-DPB1,ITGB2,HLA-DRA,HLA-DPA1,CXCL9,F13A1,LAPTM5,CCL2,POSTN,HLA-DQA1,HCLS1,CCL4,MMP9,FCER1G,PTPRC
GO:BP	regulation of response to external stimulus	GO:0032101	0.00008050263987419964	4.0941898778433155	740	81	17	17622	CXCL10,PLAU,C3AR1,CCL5,ITGB2,EBI2,LY86,FAP,SERPINF1,FCGR2B,LY96,CCL2,ALOX5AP,CCL4,MMP9,FCER1G,PTPRC
GO:BP	cell surface receptor signaling pathway	GO:0007166	0.00008281700575810323	4.0818804754303635	3022	81	35	17622	IL7R,SFRP4,CXCL10,DCN,IL10RA,VCAM1,C3AR1,CCL5,HLA-DPB1,IGHM,FCGR2A,ITGB2,TYROBP,HLA-DRA,SULF1,HLA-DPA1,CXCL9,IGLV3-25,LY86,F13A1,FCGR2B,IGKV1-5,CD53,LY96,CCL2,POSTN,HLA-DQA1,CD2,MNDA,HCLS1,CCL4,MMP9,FCER1G,PTPRC,CD14
GO:BP	regulation of lymphocyte activation	GO:0051249	0.00008379510921160872	4.0767813286775425	480	81	14	17622	IL7R,VCAM1,SAMSN1,CCL5,HLA-DPB1,IGHM,HLA-DPA1,EBI2,GPNMB,FCGR2B,CCL2,CD2,MNDA,PTPRC
GO:BP	response to stress	GO:0006950	0.00009298094936487535	4.031606023846395	3842	81	40	17622	VSIG4,CXCL10,C1QA,DCN,CD163,VCAM1,PLAU,C3AR1,CCL5,HLA-DPB1,C1S,IGHM,ITGB2,TYROBP,HLA-DRA,UBD,HLA-DPA1,CXCL9,LY86,F13A1,FAP,RNASE6,SERPINF1,LYZ,FCGR2B,LY96,CCL2,ALOX5AP,POSTN,SERPINA1,C1QB,HLA-DQA1,GPX3,CD48,MNDA,CCL4,MMP9,FCER1G,PTPRC,CD14
GO:BP	immune response-activating cell surface receptor signaling pathway	GO:0002429	0.0001002919528976233	3.9987339119682157	409	81	13	17622	C3AR1,HLA-DPB1,IGHM,FCGR2A,HLA-DRA,HLA-DPA1,IGLV3-25,FCGR2B,IGKV1-5,HLA-DQA1,MNDA,FCER1G,PTPRC
GO:BP	neutrophil migration	GO:1990266	0.0001325250894492535	3.8777018939696433	115	81	8	17622	CXCL10,C3AR1,CCL5,ITGB2,CXCL9,CCL2,CCL4,FCER1G
GO:BP	leukocyte differentiation	GO:0002521	0.00015731992294718667	3.803216274972816	505	81	14	17622	IL7R,VCAM1,TYROBP,EVI2B,UBD,EBI2,FCGR2B,TMEM176B,CD2,TMEM176A,HCLS1,MMP9,FCER1G,PTPRC
GO:BP	localization of cell	GO:0051674	0.0001701479331530122	3.7691733220644608	1684	81	25	17622	CXCL10,DCN,VCAM1,PLAU,C3AR1,CCL5,IGHM,ITGB2,SULF1,EBI2,CXCL9,IGLV3-25,FAP,SERPINF1,GPNMB,IGKV1-5,CCL2,POSTN,CD2,CD48,CCL4,MMP9,FCER1G,PTPRC,ARHGDIB
GO:BP	cell motility	GO:0048870	0.0001701479331530122	3.7691733220644608	1684	81	25	17622	CXCL10,DCN,VCAM1,PLAU,C3AR1,CCL5,IGHM,ITGB2,SULF1,EBI2,CXCL9,IGLV3-25,FAP,SERPINF1,GPNMB,IGKV1-5,CCL2,POSTN,CD2,CD48,CCL4,MMP9,FCER1G,PTPRC,ARHGDIB
GO:BP	granulocyte chemotaxis	GO:0071621	0.0001848210128706863	3.733248654030416	120	81	8	17622	CXCL10,C3AR1,CCL5,ITGB2,CXCL9,CCL2,CCL4,FCER1G
GO:BP	response to bacterium	GO:0009617	0.00021535756536707572	3.6668398671590388	696	81	16	17622	CXCL10,DCN,IL10RA,VCAM1,CCL5,IGHM,CXCL9,LY86,RNASE6,LYZ,FCGR2B,LY96,CCL2,RGS1,FCER1G,CD14
GO:BP	immune response-regulating cell surface receptor signaling pathway	GO:0002768	0.00023479339077829879	3.6293141322494358	440	81	13	17622	C3AR1,HLA-DPB1,IGHM,FCGR2A,HLA-DRA,HLA-DPA1,IGLV3-25,FCGR2B,IGKV1-5,HLA-DQA1,MNDA,FCER1G,PTPRC
GO:BP	regulation of humoral immune response	GO:0002920	0.00023860013653121857	3.6223293121546214	124	81	8	17622	C1QA,C3AR1,C1S,IGLV3-25,FCGR2B,IGKV1-5,C1QB,PTPRC
GO:BP	response to organic substance	GO:0010033	0.0003313028405746341	3.4797748404820594	3189	81	35	17622	IL7R,SFRP4,CXCL10,DCN,IL10RA,VCAM1,CCL5,HLA-DPB1,LUM,ITGB2,HLA-DRA,SULF1,UBD,HLA-DPA1,CXCL9,LY86,F13A1,COL5A2,SERPINF1,RAB31,LAPTM5,FCGR2B,LY96,CCL2,NNMT,POSTN,HLA-DQA1,GPX3,HCLS1,CCL4,MMP9,FCER1G,PTPRC,CD14,TDO2
GO:BP	lymphocyte activation	GO:0046649	0.00033555556127871293	3.4742355590749487	719	81	16	17622	IL7R,VCAM1,SAMSN1,CCL5,HLA-DPB1,IGHM,ITGB2,HLA-DPA1,EBI2,GPNMB,FCGR2B,CCL2,CD2,MNDA,FCER1G,PTPRC
GO:BP	positive regulation of leukocyte activation	GO:0002696	0.00036465869115106137	3.4381134311508483	379	81	12	17622	IL7R,VCAM1,CCL5,HLA-DPB1,IGHM,ITGB2,HLA-DPA1,EBI2,CCL2,CD2,FCER1G,PTPRC
GO:BP	vesicle-mediated transport	GO:0016192	0.00046929926677071235	3.328550124325077	2043	81	27	17622	SFRP4,FGL2,SRGN,CD163,PLAU,C3AR1,CCL5,IGHM,FCGR2A,ITGB2,TYROBP,GLIPR1,IGLV3-25,F13A1,LYZ,RAB31,FCGR2B,IGKV1-5,CD53,CCL2,SERPINA1,APOC1,MNDA,MMP9,FCER1G,PTPRC,CD14
GO:BP	granulocyte migration	GO:0097530	0.0004879432856964227	3.31163065369496	136	81	8	17622	CXCL10,C3AR1,CCL5,ITGB2,CXCL9,CCL2,CCL4,FCER1G
GO:BP	positive regulation of cell activation	GO:0050867	0.0005100568340071816	3.2923814291559945	391	81	12	17622	IL7R,VCAM1,CCL5,HLA-DPB1,IGHM,ITGB2,HLA-DPA1,EBI2,CCL2,CD2,FCER1G,PTPRC
GO:BP	regulation of multicellular organismal process	GO:0051239	0.000565270930222477	3.2477433481124747	3098	81	34	17622	IL7R,SFRP4,CXCL10,DCN,SRGN,PLAU,C3AR1,HLA-DPB1,LUM,ITGB2,TYROBP,EVI2B,SULF1,HLA-DPA1,EBI2,COL5A2,FAP,SERPINF1,THBS2,GPNMB,FCGR2B,LY96,POSTN,APOC1,TMEM176B,CD2,TMEM176A,CTSK,HCLS1,MMP9,FCER1G,PTPRC,CD14,ARHGDIB
GO:BP	response to interferon-gamma	GO:0034341	0.0006463205112674163	3.1895520613310704	195	81	9	17622	VCAM1,CCL5,HLA-DPB1,HLA-DRA,UBD,HLA-DPA1,CCL2,HLA-DQA1,CCL4
GO:BP	response to external stimulus	GO:0009605	0.0006994472695382544	3.155245020860166	2367	81	29	17622	CXCL10,DCN,IL10RA,COL11A1,VCAM1,PLAU,C3AR1,CCL5,IGHM,ITGB2,EBI2,CXCL9,LY86,FAP,RNASE6,SERPINF1,LYZ,GPNMB,FCGR2B,LY96,CCL2,ALOX5AP,POSTN,RGS1,CCL4,MMP9,FCER1G,PTPRC,CD14
GO:BP	cellular response to chemical stimulus	GO:0070887	0.0008500118434785364	3.0705750230838937	3150	81	34	17622	IL7R,SFRP4,CXCL10,DCN,IL10RA,VCAM1,C3AR1,CCL5,HLA-DPB1,ITGB2,HLA-DRA,SULF1,HLA-DPA1,EBI2,CXCL9,LY86,F13A1,COL5A2,SERPINF1,RAB31,LAPTM5,FCGR2B,LY96,CCL2,ALOX5AP,POSTN,HLA-DQA1,GPX3,HCLS1,CCL4,MMP9,FCER1G,PTPRC,CD14
GO:BP	antigen processing and presentation of peptide or polysaccharide antigen via MHC class II	GO:0002504	0.0009633682404768579	3.0162076752449645	101	81	7	17622	HLA-DPB1,HLA-DRA,HLA-DPA1,FCGR2B,HLA-DQA1,HLA-DQB1,FCER1G
GO:BP	lymphocyte proliferation	GO:0046651	0.0009687415716786655	3.01379206295208	268	81	10	17622	IL7R,VCAM1,CCL5,HLA-DPB1,HLA-DPA1,EBI2,GPNMB,FCGR2B,MNDA,PTPRC
GO:BP	mononuclear cell proliferation	GO:0032943	0.0010371613426404156	2.9841536787430494	270	81	10	17622	IL7R,VCAM1,CCL5,HLA-DPB1,HLA-DPA1,EBI2,GPNMB,FCGR2B,MNDA,PTPRC
GO:BP	secretion by cell	GO:0032940	0.0011091807310167543	2.9549976837081178	1467	81	22	17622	FGL2,SRGN,PLAU,C3AR1,CCL5,FCGR2A,ITGB2,TYROBP,GLIPR1,F13A1,LYZ,RAB31,FCGR2B,CD53,POSTN,SERPINA1,CD2,MNDA,MMP9,FCER1G,PTPRC,CD14
GO:BP	response to other organism	GO:0051707	0.0011101737884505298	2.9546090307113104	997	81	18	17622	CXCL10,DCN,IL10RA,VCAM1,CCL5,IGHM,CXCL9,LY86,RNASE6,LYZ,FCGR2B,LY96,CCL2,RGS1,CCL4,FCER1G,PTPRC,CD14
GO:BP	regulation of lymphocyte proliferation	GO:0050670	0.001114311412010984	2.952993421713372	208	81	9	17622	VCAM1,CCL5,HLA-DPB1,HLA-DPA1,EBI2,GPNMB,FCGR2B,MNDA,PTPRC
GO:BP	response to external biotic stimulus	GO:0043207	0.0011431806523681087	2.9418851343228174	999	81	18	17622	CXCL10,DCN,IL10RA,VCAM1,CCL5,IGHM,CXCL9,LY86,RNASE6,LYZ,FCGR2B,LY96,CCL2,RGS1,CCL4,FCER1G,PTPRC,CD14
GO:BP	regulation of mononuclear cell proliferation	GO:0032944	0.0011601614022183286	2.935481587310444	209	81	9	17622	VCAM1,CCL5,HLA-DPB1,HLA-DPA1,EBI2,GPNMB,FCGR2B,MNDA,PTPRC
GO:BP	response to molecule of bacterial origin	GO:0002237	0.001207670258574575	2.918051628984769	346	81	11	17622	CXCL10,DCN,IL10RA,VCAM1,CCL5,CXCL9,LY86,FCGR2B,LY96,CCL2,CD14
GO:BP	humoral immune response mediated by circulating immunoglobulin	GO:0002455	0.001265290263282734	2.8978098339493896	154	81	8	17622	C1QA,C1S,IGHM,IGLV3-25,FCGR2B,IGKV1-5,C1QB,PTPRC
GO:BP	leukocyte chemotaxis	GO:0030595	0.0014711810451376534	2.8323338792329706	215	81	9	17622	CXCL10,C3AR1,CCL5,ITGB2,EBI2,CXCL9,CCL2,CCL4,FCER1G
GO:BP	cellular response to organic substance	GO:0071310	0.0016295994946781945	2.7879191186780603	2612	81	30	17622	IL7R,SFRP4,CXCL10,DCN,IL10RA,VCAM1,CCL5,HLA-DPB1,ITGB2,HLA-DRA,SULF1,HLA-DPA1,CXCL9,LY86,F13A1,COL5A2,SERPINF1,RAB31,LAPTM5,FCGR2B,LY96,CCL2,POSTN,HLA-DQA1,HCLS1,CCL4,MMP9,FCER1G,PTPRC,CD14
GO:BP	immunoglobulin mediated immune response	GO:0016064	0.0016521232230372392	2.781957564104399	218	81	9	17622	C1QA,C1S,IGHM,IGLV3-25,FCGR2B,IGKV1-5,C1QB,FCER1G,PTPRC
GO:BP	regulation of leukocyte proliferation	GO:0070663	0.0017165745265424383	2.7653373365647576	219	81	9	17622	VCAM1,CCL5,HLA-DPB1,HLA-DPA1,EBI2,GPNMB,FCGR2B,MNDA,PTPRC
GO:BP	B cell mediated immunity	GO:0019724	0.0017165745265424383	2.7653373365647576	219	81	9	17622	C1QA,C1S,IGHM,IGLV3-25,FCGR2B,IGKV1-5,C1QB,FCER1G,PTPRC
GO:BP	response to biotic stimulus	GO:0009607	0.001758687293273399	2.75481137423145	1029	81	18	17622	CXCL10,DCN,IL10RA,VCAM1,CCL5,IGHM,CXCL9,LY86,RNASE6,LYZ,FCGR2B,LY96,CCL2,RGS1,CCL4,FCER1G,PTPRC,CD14
GO:BP	leukocyte proliferation	GO:0070661	0.0018120599987377435	2.74182742658783	287	81	10	17622	IL7R,VCAM1,CCL5,HLA-DPB1,HLA-DPA1,EBI2,GPNMB,FCGR2B,MNDA,PTPRC
GO:BP	negative regulation of immune system process	GO:0002683	0.0018350017450273531	2.7363635184116792	441	81	12	17622	IL7R,SAMSN1,GPNMB,FCGR2B,LY96,CCL2,TMEM176B,TMEM176A,MNDA,FCER1G,PTPRC,CD14
GO:BP	locomotion	GO:0040011	0.0019354262689393524	2.713223368701887	1912	81	25	17622	CXCL10,DCN,VCAM1,PLAU,C3AR1,CCL5,IGHM,ITGB2,SULF1,EBI2,CXCL9,IGLV3-25,FAP,SERPINF1,GPNMB,IGKV1-5,CCL2,POSTN,CD2,CD48,CCL4,MMP9,FCER1G,PTPRC,ARHGDIB
GO:BP	cell chemotaxis	GO:0060326	0.0021869492390020244	2.6601612971988327	293	81	10	17622	CXCL10,VCAM1,C3AR1,CCL5,ITGB2,EBI2,CXCL9,CCL2,CCL4,FCER1G
GO:BP	negative regulation of T cell mediated cytotoxicity	GO:0001915	0.0022129553630660607	2.655027346022859	5	81	3	17622	IL7R,FCGR2B,PTPRC
GO:BP	negative regulation of dendritic cell differentiation	GO:2001199	0.0022129553630660607	2.655027346022859	5	81	3	17622	FCGR2B,TMEM176B,TMEM176A
GO:BP	T cell activation	GO:0042110	0.0023774979052857345	2.6238798570291384	452	81	12	17622	IL7R,VCAM1,CCL5,HLA-DPB1,HLA-DPA1,EBI2,GPNMB,FCGR2B,CCL2,CD2,FCER1G,PTPRC
GO:BP	regulation of cytokine production	GO:0001817	0.0031408295558435187	2.50295563092563	647	81	14	17622	SRGN,C3AR1,HLA-DPB1,LUM,SULF1,HLA-DPA1,GPNMB,FCGR2B,LY96,POSTN,CD2,FCER1G,PTPRC,CD14
GO:BP	cellular response to interferon-gamma	GO:0071346	0.003329913524614026	2.4775670446530174	175	81	8	17622	VCAM1,CCL5,HLA-DPB1,HLA-DRA,HLA-DPA1,CCL2,HLA-DQA1,CCL4
GO:BP	regulation of T cell activation	GO:0050863	0.0035369309069459487	2.4513734239356575	309	81	10	17622	IL7R,VCAM1,CCL5,HLA-DPB1,HLA-DPA1,GPNMB,FCGR2B,CCL2,CD2,PTPRC
GO:BP	complement activation	GO:0006956	0.003626738162004993	2.4404837978524836	177	81	8	17622	VSIG4,C1QA,C3AR1,C1S,IGHM,IGLV3-25,IGKV1-5,C1QB
GO:BP	regulation of cell adhesion	GO:0030155	0.00481718430660832	2.3172067371583265	671	81	14	17622	IL7R,VCAM1,PLAU,CCL5,HLA-DPB1,HLA-DPA1,TGFBI,GPNMB,FCGR2B,CCL2,POSTN,ADAMDEC1,PTPRC,ARHGDIB
GO:BP	secretion	GO:0046903	0.0050460577915924735	2.2970477798933575	1605	81	22	17622	FGL2,SRGN,PLAU,C3AR1,CCL5,FCGR2A,ITGB2,TYROBP,GLIPR1,F13A1,LYZ,RAB31,FCGR2B,CD53,POSTN,SERPINA1,CD2,MNDA,MMP9,FCER1G,PTPRC,CD14
GO:BP	response to chemical	GO:0042221	0.005484394560014652	2.260871308610251	4622	81	41	17622	IL7R,SFRP4,CXCL10,C1QA,DCN,IL10RA,VCAM1,PLAU,C3AR1,CCL5,HLA-DPB1,LUM,ITGB2,HLA-DRA,SULF1,UBD,HLA-DPA1,EBI2,CXCL9,LY86,F13A1,COL5A2,SERPINF1,GPNMB,RAB31,LAPTM5,FCGR2B,LY96,CCL2,NNMT,ALOX5AP,POSTN,HLA-DQA1,GPX3,HCLS1,CCL4,MMP9,FCER1G,PTPRC,CD14,TDO2
GO:BP	response to lipopolysaccharide	GO:0032496	0.006729951546695315	2.1719880625336168	332	81	10	17622	CXCL10,DCN,IL10RA,VCAM1,CCL5,CXCL9,LY86,LY96,CCL2,CD14
GO:BP	leukocyte cell-cell adhesion	GO:0007159	0.006729951546695315	2.1719880625336168	332	81	10	17622	IL7R,VCAM1,CCL5,HLA-DPB1,ITGB2,HLA-DPA1,GPNMB,FCGR2B,CCL2,PTPRC
GO:BP	receptor-mediated endocytosis	GO:0006898	0.0076877842676012975	2.1141988122157964	337	81	10	17622	SFRP4,CD163,ITGB2,IGLV3-25,RAB31,FCGR2B,IGKV1-5,APOC1,FCER1G,CD14
GO:BP	cell adhesion	GO:0007155	0.0077244143168349304	2.112134439878472	1387	81	20	17622	IL7R,VCAN,VCAM1,PLAU,CCL5,HLA-DPB1,ITGB2,HLA-DPA1,FAP,TGFBI,THBS2,GPNMB,FCGR2B,CCL2,POSTN,ADAMDEC1,CD2,CCL4,PTPRC,ARHGDIB
GO:BP	positive regulation of cytokine production	GO:0001819	0.008161944030975483	2.088206387646777	421	81	11	17622	C3AR1,HLA-DPB1,LUM,SULF1,HLA-DPA1,LY96,POSTN,CD2,FCER1G,PTPRC,CD14
GO:BP	biological adhesion	GO:0022610	0.008432159522419594	2.0740611859252622	1395	81	20	17622	IL7R,VCAN,VCAM1,PLAU,CCL5,HLA-DPB1,ITGB2,HLA-DPA1,FAP,TGFBI,THBS2,GPNMB,FCGR2B,CCL2,POSTN,ADAMDEC1,CD2,CCL4,PTPRC,ARHGDIB
GO:BP	skeletal system development	GO:0001501	0.008836200267663163	2.053734449641324	513	81	12	17622	SFRP4,COL11A1,LUM,TYROBP,SULF1,COL5A2,TGFBI,POSTN,CTSK,COL10A1,MMP9,PTPRC
GO:BP	myeloid leukocyte migration	GO:0097529	0.00902010024124258	2.044788636074842	200	81	8	17622	CXCL10,C3AR1,CCL5,ITGB2,CXCL9,CCL2,CCL4,FCER1G
GO:BP	lymphocyte mediated immunity	GO:0002449	0.009467417153048776	2.023768486590678	345	81	10	17622	IL7R,C1QA,C1S,IGHM,IGLV3-25,FCGR2B,IGKV1-5,C1QB,FCER1G,PTPRC
GO:BP	regulation of leukocyte differentiation	GO:1902105	0.009658243937710923	2.0151018298464303	270	81	9	17622	IL7R,TYROBP,EVI2B,FCGR2B,TMEM176B,CD2,TMEM176A,HCLS1,PTPRC
GO:BP	adaptive immune response	GO:0002250	0.009959200209992447	2.001775536911002	614	81	13	17622	IL7R,C1QA,SAMSN1,C1S,IGHM,EBI2,IGLV3-25,FCGR2B,IGKV1-5,C1QB,CD48,FCER1G,PTPRC
GO:BP	phagocytosis	GO:0006909	0.009964596571809153	2.0015402795208246	347	81	10	17622	IGHM,FCGR2A,ITGB2,IGLV3-25,FCGR2B,IGKV1-5,CCL2,FCER1G,PTPRC,CD14
GO:BP	regulation of immune effector process	GO:0002697	0.010444142077451203	1.9811272288604522	432	81	11	17622	IL7R,C1QA,C3AR1,C1S,ITGB2,IGLV3-25,FCGR2B,IGKV1-5,C1QB,FCER1G,PTPRC
GO:BP	cytokine production	GO:0001816	0.011087033526101905	1.955184639205461	721	81	14	17622	SRGN,C3AR1,HLA-DPB1,LUM,SULF1,HLA-DPA1,GPNMB,FCGR2B,LY96,POSTN,CD2,FCER1G,PTPRC,CD14
GO:BP	regulation of lymphocyte chemotaxis	GO:1901623	0.011591858292283302	1.935846936651407	25	81	4	17622	CXCL10,CCL5,CCL2,CCL4
GO:BP	antigen processing and presentation of exogenous peptide antigen via MHC class II	GO:0019886	0.011677008489280787	1.9326684040560729	95	81	6	17622	HLA-DPB1,HLA-DRA,HLA-DPA1,FCGR2B,HLA-DQA1,FCER1G
GO:BP	adaptive immune response based on somatic recombination of immune receptors built from immunoglobulin superfamily domains	GO:0002460	0.011887826835621024	1.9248975297007596	354	81	10	17622	IL7R,C1QA,C1S,IGHM,IGLV3-25,FCGR2B,IGKV1-5,C1QB,FCER1G,PTPRC
GO:BP	regulation of natural killer cell chemotaxis	GO:2000501	0.01226958435502731	1.911170149202544	8	81	3	17622	CCL5,CCL2,CCL4
GO:BP	cellular response to molecule of bacterial origin	GO:0071219	0.013865860107973409	1.8580531856922509	212	81	8	17622	CXCL10,CCL5,CXCL9,LY86,FCGR2B,LY96,CCL2,CD14
GO:BP	antigen processing and presentation of peptide antigen via MHC class II	GO:0002495	0.013988733404541728	1.8542216064746189	98	81	6	17622	HLA-DPB1,HLA-DRA,HLA-DPA1,FCGR2B,HLA-DQA1,FCER1G
GO:BP	movement of cell or subcellular component	GO:0006928	0.014809269838506398	1.82946635356014	2137	81	25	17622	CXCL10,DCN,VCAM1,PLAU,C3AR1,CCL5,IGHM,ITGB2,SULF1,EBI2,CXCL9,IGLV3-25,FAP,SERPINF1,GPNMB,IGKV1-5,CCL2,POSTN,CD2,CD48,CCL4,MMP9,FCER1G,PTPRC,ARHGDIB
GO:BP	lipopolysaccharide-mediated signaling pathway	GO:0031663	0.017770393784816953	1.7503029482960943	59	81	5	17622	CCL5,LY86,LY96,CCL2,CD14
GO:BP	regulation of developmental process	GO:0050793	0.01840330237405186	1.7351042381784962	2615	81	28	17622	IL7R,SFRP4,CXCL10,DCN,SRGN,C3AR1,ITGB2,TYROBP,EVI2B,SULF1,EBI2,CXCL9,COL5A2,SERPINF1,THBS2,GPNMB,FCGR2B,CD53,CCL2,POSTN,TMEM176B,CD2,TMEM176A,CTSK,HCLS1,HOPX,PTPRC,ARHGDIB
GO:BP	positive regulation of response to external stimulus	GO:0032103	0.02030960112674828	1.6922986058986527	296	81	9	17622	CXCL10,C3AR1,CCL5,ITGB2,LY86,LY96,ALOX5AP,CCL4,FCER1G
GO:BP	regulation of complement activation	GO:0030449	0.020848444475866514	1.6809263426446104	105	81	6	17622	C1QA,C3AR1,C1S,IGLV3-25,IGKV1-5,C1QB
GO:BP	regulation of leukocyte cell-cell adhesion	GO:1903037	0.020866993256866084	1.680540124294624	297	81	9	17622	IL7R,VCAM1,CCL5,HLA-DPB1,HLA-DPA1,GPNMB,FCGR2B,CCL2,PTPRC
GO:BP	lymphocyte chemotaxis	GO:0048247	0.02272305363833233	1.6435333063604811	62	81	5	17622	CXCL10,CCL5,EBI2,CCL2,CCL4
GO:BP	positive regulation of biological process	GO:0048518	0.02373081167236763	1.624687407218738	6039	81	47	17622	IL7R,SFRP4,VSIG4,CXCL10,C1QA,DCN,VCAM1,PLAU,C3AR1,CCL5,HLA-DPB1,LUM,C1S,IGHM,FCGR2A,ITGB2,HLA-DRA,EVI2B,SULF1,UBD,HLA-DPA1,EBI2,CXCL9,IGLV3-25,LY86,FAP,SERPINF1,THBS2,GPNMB,FCGR2B,IGKV1-5,CD53,LY96,CCL2,ALOX5AP,POSTN,C1QB,HLA-DQA1,APOC1,CD2,MNDA,HCLS1,CCL4,MMP9,FCER1G,PTPRC,CD14
GO:BP	acute inflammatory response	GO:0002526	0.025853716732226504	1.587477013875048	109	81	6	17622	CD163,VCAM1,FCGR2B,ALOX5AP,SERPINA1,FCER1G
GO:BP	regulation of dendritic cell differentiation	GO:2001198	0.026117832586642707	1.5830628662452468	10	81	3	17622	FCGR2B,TMEM176B,TMEM176A
GO:BP	natural killer cell chemotaxis	GO:0035747	0.026117832586642707	1.5830628662452468	10	81	3	17622	CCL5,CCL2,CCL4
GO:BP	cellular response to biotic stimulus	GO:0071216	0.028525567189752757	1.544765711504634	234	81	8	17622	CXCL10,CCL5,CXCL9,LY86,FCGR2B,LY96,CCL2,CD14
GO:BP	regulation of cell migration	GO:0030334	0.033133423294878214	1.4797336911548595	906	81	15	17622	CXCL10,DCN,PLAU,C3AR1,CCL5,SULF1,EBI2,SERPINF1,GPNMB,CCL2,POSTN,CCL4,MMP9,PTPRC,ARHGDIB
GO:BP	antigen processing and presentation	GO:0019882	0.03631031016298581	1.4399700413240144	174	81	7	17622	HLA-DPB1,HLA-DRA,HLA-DPA1,FCGR2B,HLA-DQA1,HLA-DQB1,FCER1G
GO:BP	regulation of cell population proliferation	GO:0042127	0.0397888357123555	1.400238768848014	1684	81	21	17622	IL7R,SFRP4,CXCL10,VCAM1,PLAU,CCL5,HLA-DPB1,SULF1,HLA-DPA1,EBI2,CXCL9,FAP,SERPINF1,RARRES1,GPNMB,FCGR2B,CCL2,MNDA,HCLS1,MMP9,PTPRC
GO:BP	anatomical structure formation involved in morphogenesis	GO:0048646	0.04043876150286628	1.3932021537909158	1161	81	17	17622	CXCL10,DCN,COL11A1,C3AR1,ITGB2,SULF1,CXCL9,COL5A2,FAP,TGFBI,SERPINF1,THBS2,GPNMB,CD53,CCL2,HOPX,MMP9
GO:BP	antigen processing and presentation of exogenous peptide antigen	GO:0002478	0.04696882443637203	1.3281903094609018	121	81	6	17622	HLA-DPB1,HLA-DRA,HLA-DPA1,FCGR2B,HLA-DQA1,FCER1G
GO:BP	positive regulation of tumor necrosis factor production	GO:0032760	0.04739964226798772	1.3242249359973326	72	81	5	17622	LY96,CD2,FCER1G,PTPRC,CD14
GO:CC	extracellular space	GO:0005615	1.269376657714262e-11	10.896409492093511	3494	85	47	18745	SFRP4,CXCL10,C1QA,DCN,VCAN,COL11A1,FGL2,SRGN,VCAM1,PLAU,CCL5,LUM,C1S,IGHM,ITGB2,HLA-DRA,GLIPR1,SULF1,CXCL9,IGLV3-25,LY86,F13A1,COL5A2,FAP,TGFBI,RNASE6,SERPINF1,LYZ,RARRES1,IGKV1-5,CD53,LY96,CCL2,POSTN,SERPINA1,C1QB,APOC1,GPX3,CD48,MNDA,CTSK,CCL4,COL10A1,MMP9,PTPRC,CD14,ARHGDIB
GO:CC	extracellular region part	GO:0044421	2.065519553460417e-11	10.684970689373056	3694	85	48	18745	SFRP4,CXCL10,C1QA,DCN,VCAN,COL11A1,FGL2,SRGN,VCAM1,PLAU,CCL5,LUM,C1S,IGHM,ITGB2,HLA-DRA,GLIPR1,SULF1,CXCL9,IGLV3-25,LY86,F13A1,COL5A2,FAP,TGFBI,RNASE6,SERPINF1,LYZ,RARRES1,THBS2,IGKV1-5,CD53,LY96,CCL2,POSTN,SERPINA1,C1QB,APOC1,GPX3,CD48,MNDA,CTSK,CCL4,COL10A1,MMP9,PTPRC,CD14,ARHGDIB
GO:CC	extracellular region	GO:0005576	6.952894241225965e-11	10.157834376511305	4475	85	52	18745	IL7R,SFRP4,CXCL10,C1QA,DCN,VCAN,COL11A1,FGL2,SRGN,CD163,VCAM1,PLAU,CCL5,LUM,C1S,IGHM,ITGB2,EPYC,HLA-DRA,GLIPR1,SULF1,CXCL9,IGLV3-25,LY86,F13A1,COL5A2,FAP,TGFBI,RNASE6,SERPINF1,LYZ,RARRES1,THBS2,IGKV1-5,CD53,LY96,CCL2,POSTN,SERPINA1,C1QB,APOC1,ADAMDEC1,GPX3,CD48,MNDA,CTSK,CCL4,COL10A1,MMP9,PTPRC,CD14,ARHGDIB
GO:CC	collagen-containing extracellular matrix	GO:0062023	6.089723321417916e-9	8.215402438518367	330	85	15	18745	C1QA,DCN,VCAN,COL11A1,LUM,F13A1,COL5A2,TGFBI,SERPINF1,THBS2,POSTN,SERPINA1,C1QB,COL10A1,MMP9
GO:CC	cytoplasmic vesicle part	GO:0044433	3.620907101523312e-8	7.441182617357346	1461	85	27	18745	IL7R,FGL2,SRGN,CD163,PLAU,C3AR1,HLA-DPB1,FCGR2A,ITGB2,TYROBP,HLA-DRA,GLIPR1,HLA-DPA1,F13A1,LYZ,GPNMB,RAB31,CD53,LY96,SERPINA1,HLA-DQA1,MNDA,CTSK,MMP9,FCER1G,PTPRC,CD14
GO:CC	cell surface	GO:0009986	4.7152664772454136e-8	7.326493758636723	859	85	21	18745	IL7R,SFRP4,CXCL10,CD163,VCAM1,PLAU,HLA-DPB1,IGHM,ITGB2,TYROBP,HLA-DRA,SULF1,HLA-DPA1,CXCL9,FAP,FCGR2B,CD53,CD2,FCER1G,PTPRC,CD14
GO:CC	side of membrane	GO:0098552	1.3435286816784388e-7	6.871753057804153	560	85	17	18745	IL7R,CXCL10,CD163,VCAM1,HLA-DPB1,IGHM,ITGB2,HLA-DRA,HLA-DPA1,CXCL9,FCGR2B,HLA-DQA1,CD2,RGS1,FCER1G,PTPRC,CD14
GO:CC	cytoplasmic vesicle	GO:0031410	4.219854874113601e-7	6.37470248469127	2273	85	32	18745	IL7R,FGL2,SRGN,CD163,VCAM1,PLAU,C3AR1,HLA-DPB1,FCGR2A,ITGB2,TYROBP,HLA-DRA,GLIPR1,HLA-DPA1,F13A1,RNASE6,SERPINF1,LYZ,THBS2,GPNMB,RAB31,CD53,LY96,SERPINA1,HLA-DQA1,MNDA,CTSK,MMP9,FCER1G,PTPRC,CD14,ARHGDIB
GO:CC	intracellular vesicle	GO:0097708	4.362489193233474e-7	6.360265635866548	2276	85	32	18745	IL7R,FGL2,SRGN,CD163,VCAM1,PLAU,C3AR1,HLA-DPB1,FCGR2A,ITGB2,TYROBP,HLA-DRA,GLIPR1,HLA-DPA1,F13A1,RNASE6,SERPINF1,LYZ,THBS2,GPNMB,RAB31,CD53,LY96,SERPINA1,HLA-DQA1,MNDA,CTSK,MMP9,FCER1G,PTPRC,CD14,ARHGDIB
GO:CC	secretory granule	GO:0030141	0.0000012394504269303053	5.906770838594552	831	85	19	18745	FGL2,SRGN,PLAU,C3AR1,FCGR2A,ITGB2,TYROBP,GLIPR1,F13A1,LYZ,THBS2,RAB31,CD53,SERPINA1,MNDA,MMP9,FCER1G,PTPRC,CD14
GO:CC	cytoplasmic vesicle membrane	GO:0030659	0.000001445619003433729	5.839946151376732	745	85	18	18745	IL7R,CD163,PLAU,C3AR1,HLA-DPB1,FCGR2A,ITGB2,TYROBP,HLA-DRA,GLIPR1,HLA-DPA1,GPNMB,RAB31,CD53,HLA-DQA1,FCER1G,PTPRC,CD14
GO:CC	extracellular matrix	GO:0031012	0.0000014814883881378806	5.82930174815788	491	85	15	18745	C1QA,DCN,VCAN,COL11A1,LUM,F13A1,COL5A2,TGFBI,SERPINF1,THBS2,POSTN,SERPINA1,C1QB,COL10A1,MMP9
GO:CC	MHC class II protein complex	GO:0042613	0.0000020898537715558012	5.679884100696672	16	85	5	18745	HLA-DPB1,HLA-DRA,HLA-DPA1,HLA-DQA1,HLA-DQB1
GO:CC	vesicle membrane	GO:0012506	0.0000022281528716517545	5.652055015905302	766	85	18	18745	IL7R,CD163,PLAU,C3AR1,HLA-DPB1,FCGR2A,ITGB2,TYROBP,HLA-DRA,GLIPR1,HLA-DPA1,GPNMB,RAB31,CD53,HLA-DQA1,FCER1G,PTPRC,CD14
GO:CC	secretory vesicle	GO:0099503	0.00001666228841872975	4.77826535230646	977	85	19	18745	FGL2,SRGN,PLAU,C3AR1,FCGR2A,ITGB2,TYROBP,GLIPR1,F13A1,LYZ,THBS2,RAB31,CD53,SERPINA1,MNDA,MMP9,FCER1G,PTPRC,CD14
GO:CC	MHC protein complex	GO:0042611	0.00001976475430018988	4.704108580093334	24	85	5	18745	HLA-DPB1,HLA-DRA,HLA-DPA1,HLA-DQA1,HLA-DQB1
GO:CC	secretory granule membrane	GO:0030667	0.00002523339138268695	4.598024376125074	293	85	11	18745	PLAU,C3AR1,FCGR2A,ITGB2,TYROBP,GLIPR1,RAB31,CD53,FCER1G,PTPRC,CD14
GO:CC	external side of plasma membrane	GO:0009897	0.000026614424997017277	4.57488291229491	365	85	12	18745	IL7R,CXCL10,CD163,VCAM1,IGHM,ITGB2,CXCL9,FCGR2B,CD2,FCER1G,PTPRC,CD14
GO:CC	vesicle	GO:0031982	0.000028666766499634627	4.542621291028481	3811	85	39	18745	IL7R,FGL2,SRGN,CD163,VCAM1,PLAU,C3AR1,HLA-DPB1,LUM,IGHM,FCGR2A,ITGB2,TYROBP,HLA-DRA,GLIPR1,HLA-DPA1,F13A1,TGFBI,RNASE6,SERPINF1,LYZ,RARRES1,THBS2,GPNMB,RAB31,IGKV1-5,CD53,LY96,SERPINA1,HLA-DQA1,GPX3,CD48,MNDA,CTSK,MMP9,FCER1G,PTPRC,CD14,ARHGDIB
GO:CC	collagen trimer	GO:0005581	0.0000667388385363464	4.175621355692087	94	85	7	18745	C1QA,DCN,COL11A1,LUM,COL5A2,C1QB,COL10A1
GO:CC	lysosome	GO:0005764	0.00007662049885051348	4.115655024797211	663	85	15	18745	DCN,VCAN,SRGN,C3AR1,HLA-DPB1,LUM,HLA-DRA,GLIPR1,HLA-DPA1,RNASE6,LYZ,LAPTM5,HLA-DQA1,MNDA,CTSK
GO:CC	lytic vacuole	GO:0000323	0.000078110540632876	4.107290356266	664	85	15	18745	DCN,VCAN,SRGN,C3AR1,HLA-DPB1,LUM,HLA-DRA,GLIPR1,HLA-DPA1,RNASE6,LYZ,LAPTM5,HLA-DQA1,MNDA,CTSK
GO:CC	vacuolar part	GO:0044437	0.00034452461586454065	3.462779742835556	553	85	13	18745	DCN,VCAN,C3AR1,HLA-DPB1,LUM,HLA-DRA,GLIPR1,HLA-DPA1,LYZ,LAPTM5,HLA-DQA1,MNDA,CTSK
GO:CC	vacuole	GO:0005773	0.00043491444165284126	3.361596171028604	761	85	15	18745	DCN,VCAN,SRGN,C3AR1,HLA-DPB1,LUM,HLA-DRA,GLIPR1,HLA-DPA1,RNASE6,LYZ,LAPTM5,HLA-DQA1,MNDA,CTSK
GO:CC	whole membrane	GO:0098805	0.0006738007115483139	3.1714685347301685	1627	85	22	18745	IL7R,CD163,PLAU,C3AR1,HLA-DPB1,FCGR2A,ITGB2,TYROBP,HLA-DRA,GLIPR1,SULF1,HLA-DPA1,GPNMB,RAB31,LAPTM5,CD53,LY96,HLA-DQA1,CD48,FCER1G,PTPRC,CD14
GO:CC	lumenal side of endoplasmic reticulum membrane	GO:0098553	0.0011414978978160255	2.9425248839702776	24	85	4	18745	HLA-DPB1,HLA-DRA,HLA-DPA1,HLA-DQA1
GO:CC	integral component of lumenal side of endoplasmic reticulum membrane	GO:0071556	0.0011414978978160255	2.9425248839702776	24	85	4	18745	HLA-DPB1,HLA-DRA,HLA-DPA1,HLA-DQA1
GO:CC	endomembrane system	GO:0012505	0.001408752869682832	2.8511651862706646	4406	85	39	18745	DCN,VCAN,COL11A1,FGL2,SRGN,VCAM1,PLAU,C3AR1,HLA-DPB1,LUM,FCGR2A,ITGB2,TYROBP,HLA-DRA,GLIPR1,SULF1,HLA-DPA1,F13A1,COL5A2,TGFBI,LYZ,THBS2,GPNMB,RAB31,CD53,LY96,ALOX5AP,POSTN,SERPINA1,HLA-DQA1,APOC1,TMEM176B,MNDA,CTSK,COL10A1,MMP9,FCER1G,PTPRC,CD14
GO:CC	plasma membrane part	GO:0044459	0.0029667330741368764	2.5277215267011255	2830	85	29	18745	IL7R,CXCL10,CLEC2B,CD163,VCAM1,C3AR1,HLA-DPB1,IGHM,ITGB2,TYROBP,HLA-DRA,EVI2B,HLA-DPA1,EBI2,CXCL9,FAP,GPNMB,LAPTM5,FCGR2B,CD53,LY96,HLA-DQA1,HLA-DQB1,CD2,CD48,RGS1,FCER1G,PTPRC,CD14
GO:CC	intrinsic component of plasma membrane	GO:0031226	0.003264783024302131	2.4861456764040692	1655	85	21	18745	CLEC2B,CD163,VCAM1,C3AR1,ITGB2,TYROBP,HLA-DRA,EVI2B,HLA-DPA1,EBI2,GPNMB,LAPTM5,FCGR2B,CD53,LY96,HLA-DQA1,CD2,CD48,FCER1G,PTPRC,CD14
GO:CC	banded collagen fibril	GO:0098643	0.004228973024536503	2.373765085090108	11	85	3	18745	COL11A1,LUM,COL5A2
GO:CC	fibrillar collagen trimer	GO:0005583	0.004228973024536503	2.373765085090108	11	85	3	18745	COL11A1,LUM,COL5A2
GO:CC	complement component C1 complex	GO:0005602	0.005941886959429375	2.226075614626436	2	85	2	18745	C1QA,C1QB
GO:CC	clathrin-coated endocytic vesicle membrane	GO:0030669	0.009289743076085146	2.0319962970054384	40	85	4	18745	HLA-DPB1,HLA-DRA,HLA-DPA1,HLA-DQA1
GO:CC	blood microparticle	GO:0072562	0.013828832973667667	1.8592144688047743	143	85	6	18745	C1S,IGHM,IGLV3-25,F13A1,IGKV1-5,C1QB
GO:CC	trans-Golgi network membrane	GO:0032588	0.014511732232261777	1.8382807437296813	88	85	5	18745	HLA-DPB1,HLA-DRA,HLA-DPA1,RAB31,HLA-DQA1
GO:CC	COPII-coated ER to Golgi transport vesicle	GO:0030134	0.01795997452175272	1.7456942837639289	92	85	5	18745	HLA-DPB1,HLA-DRA,HLA-DPA1,SERPINA1,HLA-DQA1
GO:CC	trans-Golgi network	GO:0005802	0.021331983409581663	1.670968762750737	225	85	7	18745	HLA-DPB1,HLA-DRA,HLA-DPA1,TGFBI,RAB31,POSTN,HLA-DQA1
GO:CC	endocytic vesicle membrane	GO:0030666	0.023250266964589802	1.6335720560823033	157	85	6	18745	CD163,HLA-DPB1,HLA-DRA,HLA-DPA1,RAB31,HLA-DQA1
GO:CC	complex of collagen trimers	GO:0098644	0.024192383492997533	1.6163213417719504	19	85	3	18745	COL11A1,LUM,COL5A2
GO:CC	tertiary granule	GO:0070820	0.02764465104994493	1.5583888876583192	162	85	6	18745	PLAU,ITGB2,LYZ,CD53,MMP9,FCER1G
GO:CC	clathrin-coated vesicle membrane	GO:0030665	0.032187332862205126	1.4923150087513704	104	85	5	18745	IL7R,HLA-DPB1,HLA-DRA,HLA-DPA1,HLA-DQA1
GO:CC	vacuolar lumen	GO:0005775	0.03720404146169895	1.429409880301471	171	85	6	18745	DCN,VCAN,LUM,LYZ,MNDA,CTSK
GO:CC	ER to Golgi transport vesicle membrane	GO:0012507	0.03786667814785742	1.4217427916663956	57	85	4	18745	HLA-DPB1,HLA-DRA,HLA-DPA1,HLA-DQA1
GO:CC	clathrin-coated endocytic vesicle	GO:0045334	0.04333003153408823	1.3632109949011082	59	85	4	18745	HLA-DPB1,HLA-DRA,HLA-DPA1,HLA-DQA1
GO:CC	Golgi subcompartment	GO:0098791	0.045103349411610115	1.345791205861119	340	85	8	18745	HLA-DPB1,HLA-DRA,SULF1,HLA-DPA1,TGFBI,RAB31,POSTN,HLA-DQA1
GO:CC	plasma membrane	GO:0005886	0.04748551178791532	1.3234388769089507	5477	85	41	18745	IL7R,CXCL10,CLEC2B,IL10RA,CD163,VCAM1,PLAU,C3AR1,SAMSN1,HLA-DPB1,IGHM,FCGR2A,ITGB2,TYROBP,HLA-DRA,GLIPR1,EVI2B,SULF1,HLA-DPA1,EBI2,CXCL9,IGLV3-25,LY86,FAP,TGFBI,GPNMB,RAB31,LAPTM5,FCGR2B,IGKV1-5,CD53,LY96,HLA-DQA1,HLA-DQB1,CD2,CD48,RGS1,HCLS1,FCER1G,PTPRC,CD14
KEGG	Staphylococcus aureus infection	KEGG:05150	6.7029411687107e-14	13.173734592364655	51	54	12	7332	C1QA,C3AR1,HLA-DPB1,C1S,FCGR2A,ITGB2,HLA-DRA,HLA-DPA1,FCGR2B,C1QB,HLA-DQA1,HLA-DQB1
KEGG	Complement and coagulation cascades	KEGG:04610	3.3410954493290785e-7	6.476111117141039	79	54	9	7332	VSIG4,C1QA,PLAU,C3AR1,C1S,ITGB2,F13A1,SERPINA1,C1QB
KEGG	Rheumatoid arthritis	KEGG:05323	6.464177873792056e-7	6.189486701654336	85	54	9	7332	CCL5,HLA-DPB1,ITGB2,HLA-DRA,HLA-DPA1,CCL2,HLA-DQA1,HLA-DQB1,CTSK
KEGG	Asthma	KEGG:05310	0.0000023860220820422466	5.622325541359424	27	54	6	7332	HLA-DPB1,HLA-DRA,HLA-DPA1,HLA-DQA1,HLA-DQB1,FCER1G
KEGG	Tuberculosis	KEGG:05152	0.000002758450680276029	5.559334776605807	173	54	11	7332	IL10RA,HLA-DPB1,FCGR2A,ITGB2,HLA-DRA,HLA-DPA1,FCGR2B,HLA-DQA1,HLA-DQB1,FCER1G,CD14
KEGG	Cell adhesion molecules (CAMs)	KEGG:04514	0.000004418718580167221	5.354703656951475	141	54	10	7332	VCAN,VCAM1,HLA-DPB1,ITGB2,HLA-DRA,HLA-DPA1,HLA-DQA1,HLA-DQB1,CD2,PTPRC
KEGG	Phagosome	KEGG:04145	0.000006573199144929057	5.182223209917466	147	54	10	7332	HLA-DPB1,FCGR2A,ITGB2,HLA-DRA,HLA-DPA1,THBS2,FCGR2B,HLA-DQA1,HLA-DQB1,CD14
KEGG	Hematopoietic cell lineage	KEGG:04640	0.000024110909369676977	4.617786409415788	93	54	8	7332	IL7R,HLA-DPB1,HLA-DRA,HLA-DPA1,HLA-DQA1,HLA-DQB1,CD2,CD14
KEGG	Systemic lupus erythematosus	KEGG:05322	0.000025167588757470072	4.599158391105906	129	54	9	7332	C1QA,HLA-DPB1,C1S,FCGR2A,HLA-DRA,HLA-DPA1,C1QB,HLA-DQA1,HLA-DQB1
KEGG	Leishmaniasis	KEGG:05140	0.000040864238929962086	4.388656585123885	68	54	7	7332	HLA-DPB1,FCGR2A,ITGB2,HLA-DRA,HLA-DPA1,HLA-DQA1,HLA-DQB1
KEGG	Viral myocarditis	KEGG:05416	0.00019958605627369805	3.6998698032035575	55	54	6	7332	HLA-DPB1,ITGB2,HLA-DRA,HLA-DPA1,HLA-DQA1,HLA-DQB1
KEGG	Allograft rejection	KEGG:05330	0.00032104489716406525	3.4934342285697904	34	54	5	7332	HLA-DPB1,HLA-DRA,HLA-DPA1,HLA-DQA1,HLA-DQB1
KEGG	Graft-versus-host disease	KEGG:05332	0.00043013612447453025	3.3663940822049527	36	54	5	7332	HLA-DPB1,HLA-DRA,HLA-DPA1,HLA-DQA1,HLA-DQB1
KEGG	Toll-like receptor signaling pathway	KEGG:04620	0.000563299334970744	3.249260761490917	100	54	7	7332	CXCL10,CCL5,CXCL9,LY96,CTSK,CCL4,CD14
KEGG	Type I diabetes mellitus	KEGG:04940	0.0007341952146285959	3.134188450487395	40	54	5	7332	HLA-DPB1,HLA-DRA,HLA-DPA1,HLA-DQA1,HLA-DQB1
KEGG	Toxoplasmosis	KEGG:05145	0.0009966023316208752	3.0014781011014504	109	54	7	7332	IL10RA,HLA-DPB1,HLA-DRA,HLA-DPA1,LY96,HLA-DQA1,HLA-DQB1
KEGG	Pertussis	KEGG:05133	0.0012386578392040092	2.9070486444454064	75	54	6	7332	C1QA,C1S,ITGB2,LY96,C1QB,CD14
KEGG	Intestinal immune network for IgA production	KEGG:04672	0.0013257206303339433	2.8775479853485204	45	54	5	7332	HLA-DPB1,HLA-DRA,HLA-DPA1,HLA-DQA1,HLA-DQB1
KEGG	Influenza A	KEGG:05164	0.0019751934768839075	2.704390357339997	167	54	8	7332	CXCL10,CCL5,HLA-DPB1,HLA-DRA,HLA-DPA1,CCL2,HLA-DQA1,HLA-DQB1
KEGG	Autoimmune thyroid disease	KEGG:05320	0.0020234941245743966	2.693898052289772	49	54	5	7332	HLA-DPB1,HLA-DRA,HLA-DPA1,HLA-DQA1,HLA-DQB1
KEGG	Inflammatory bowel disease (IBD)	KEGG:05321	0.0063866845449625466	2.1947245342515034	62	54	5	7332	HLA-DPB1,HLA-DRA,HLA-DPA1,HLA-DQA1,HLA-DQB1
KEGG	Antigen processing and presentation	KEGG:04612	0.009950050135274023	2.0021747309710585	68	54	5	7332	HLA-DPB1,HLA-DRA,HLA-DPA1,HLA-DQA1,HLA-DQB1
KEGG	Herpes simplex infection	KEGG:05168	0.02500727339676755	1.6019336578613064	181	54	7	7332	CCL5,HLA-DPB1,HLA-DRA,HLA-DPA1,CCL2,HLA-DQA1,HLA-DQB1
KEGG	Malaria	KEGG:05144	0.03042670066280577	1.5167451380664925	48	54	4	7332	VCAM1,ITGB2,THBS2,CCL2
KEGG	Th1 and Th2 cell differentiation	KEGG:04658	0.03524854924940782	1.4528587528837145	89	54	5	7332	HLA-DPB1,HLA-DRA,HLA-DPA1,HLA-DQA1,HLA-DQB1
KEGG	NF-kappa B signaling pathway	KEGG:04064	0.041070381636304186	1.386471261554165	92	54	5	7332	VCAM1,PLAU,LY96,CCL4,CD14
REAC	Immune System	REAC:R-HSA-168256	1.2641134750941309e-11	10.89821393919032	2022	64	40	10478	IL7R,CXCL10,CLEC2B,C1QA,IL10RA,FGL2,VCAM1,PLAU,C3AR1,CCL5,HLA-DPB1,C1S,IGHM,FCGR2A,ITGB2,TYROBP,HLA-DRA,GLIPR1,HLA-DPA1,IGLV3-25,LY86,F13A1,RNASE6,LYZ,RAB31,FCGR2B,IGKV1-5,CD53,LY96,CCL2,SERPINA1,C1QB,HLA-DQA1,MNDA,CTSK,CCL4,MMP9,FCER1G,PTPRC,CD14
REAC	Innate Immune System	REAC:R-HSA-168249	4.915385447828519e-7	6.3084424205985945	1085	64	25	10478	C1QA,FGL2,PLAU,C3AR1,C1S,FCGR2A,ITGB2,TYROBP,GLIPR1,IGLV3-25,LY86,RNASE6,LYZ,RAB31,IGKV1-5,CD53,LY96,SERPINA1,C1QB,MNDA,CTSK,MMP9,FCER1G,PTPRC,CD14
REAC	Neutrophil degranulation	REAC:R-HSA-6798695	0.00000576575225081839	5.239144022789658	475	64	16	10478	FGL2,PLAU,C3AR1,FCGR2A,ITGB2,TYROBP,GLIPR1,LYZ,RAB31,CD53,SERPINA1,MNDA,MMP9,FCER1G,PTPRC,CD14
REAC	Phosphorylation of CD3 and TCR zeta chains	REAC:R-HSA-202427	0.00008006842602431132	4.096538708718694	23	64	5	10478	HLA-DPB1,HLA-DRA,HLA-DPA1,HLA-DQA1,PTPRC
REAC	Translocation of ZAP-70 to Immunological synapse	REAC:R-HSA-202430	0.0020352726539124124	2.691377402577445	20	64	4	10478	HLA-DPB1,HLA-DRA,HLA-DPA1,HLA-DQA1
REAC	Interleukin-10 signaling	REAC:R-HSA-6783783	0.002621716783935085	2.5814142256198296	45	64	5	10478	CXCL10,IL10RA,CCL5,CCL2,CCL4
REAC	Extracellular matrix organization	REAC:R-HSA-1474244	0.004256774714311989	2.3709193338304186	299	64	10	10478	DCN,VCAN,COL11A1,VCAM1,LUM,ITGB2,COL5A2,CTSK,COL10A1,MMP9
REAC	PD-1 signaling	REAC:R-HSA-389948	0.004382634499829215	2.358264746851437	24	64	4	10478	HLA-DPB1,HLA-DRA,HLA-DPA1,HLA-DQA1
REAC	Adaptive Immune System	REAC:R-HSA-1280218	0.0058726351209728465	2.2311669819377054	797	64	16	10478	CLEC2B,VCAM1,HLA-DPB1,IGHM,ITGB2,TYROBP,HLA-DRA,HLA-DPA1,IGLV3-25,FCGR2B,IGKV1-5,LY96,HLA-DQA1,CTSK,PTPRC,CD14
REAC	Regulation of Complement cascade	REAC:R-HSA-977606	0.01177012367891984	1.9292189736229877	101	64	6	10478	C1QA,C3AR1,C1S,IGLV3-25,IGKV1-5,C1QB
REAC	Classical antibody-mediated complement activation	REAC:R-HSA-173623	0.011842557345532611	1.9265545035991127	61	64	5	10478	C1QA,C1S,IGLV3-25,IGKV1-5,C1QB
REAC	Collagen degradation	REAC:R-HSA-1442490	0.014965533275065597	1.8249078030942916	64	64	5	10478	COL11A1,COL5A2,CTSK,COL10A1,MMP9
REAC	Cytokine Signaling in Immune system	REAC:R-HSA-1280215	0.01581396280754582	1.800959286943387	676	64	14	10478	IL7R,CXCL10,IL10RA,VCAM1,CCL5,HLA-DPB1,ITGB2,HLA-DRA,HLA-DPA1,F13A1,CCL2,HLA-DQA1,CCL4,MMP9
REAC	Generation of second messenger molecules	REAC:R-HSA-202433	0.018271187473294342	1.7382332262467903	34	64	4	10478	HLA-DPB1,HLA-DRA,HLA-DPA1,HLA-DQA1
REAC	Complement cascade	REAC:R-HSA-166658	0.020053475050925643	1.6978103579729689	111	64	6	10478	C1QA,C3AR1,C1S,IGLV3-25,IGKV1-5,C1QB
REAC	Creation of C4 and C2 activators	REAC:R-HSA-166786	0.020080483319222162	1.6972258383225822	68	64	5	10478	C1QA,C1S,IGLV3-25,IGKV1-5,C1QB
REAC	Initial triggering of complement	REAC:R-HSA-166663	0.034279146132223375	1.464970004563372	76	64	5	10478	C1QA,C1S,IGLV3-25,IGKV1-5,C1QB
REAC	Immunoregulatory interactions between a Lymphoid and a non-Lymphoid cell	REAC:R-HSA-198933	0.035594089365258326	1.4486221135206951	178	64	7	10478	CLEC2B,VCAM1,ITGB2,TYROBP,IGLV3-25,FCGR2B,IGKV1-5
WP	TYROBP Causal Network	WP:WP3945	0.000004669147273155803	5.330762427437756	63	55	8	6376	IL10RA,SAMSN1,ITGB2,TYROBP,DPYD,RNASE6,RGS1,HCLS1
WP	Allograft Rejection	WP:WP2328	0.00006569439473896368	4.182471684287821	88	55	8	6376	C1QA,HLA-DPB1,HLA-DRA,HLA-DPA1,CXCL9,C1QB,HLA-DQA1,HLA-DQB1
WP	Fibrin Complement Receptor 3 Signaling Pathway	WP:WP4136	0.00006676157876807733	4.175473401738791	38	55	6	6376	CXCL10,ITGB2,TYROBP,LY96,CCL2,CD14
WP	Complement and Coagulation Cascades	WP:WP558	0.0009483320731509027	3.023039561096452	59	55	6	6376	C1QA,PLAU,C3AR1,C1S,SERPINA1,C1QB
WP	Lung fibrosis	WP:WP3624	0.0013927312013298013	2.856132694806292	63	55	6	6376	PLAU,CCL5,CCL2,SERPINA1,CCL4,MMP9
WP	Microglia Pathogen Phagocytosis Pathway	WP:WP3937	0.001754371495644958	2.7558784375233465	39	55	5	6376	C1QA,ITGB2,TYROBP,C1QB,FCER1G
WP	Macrophage markers	WP:WP4146	0.004720844049608493	2.3259803460023725	9	55	3	6376	CD163,LYZ,CD14
WP	Human Complement System	WP:WP2806	0.017119840691872563	1.7665002809534085	98	55	6	6376	VSIG4,DCN,C3AR1,C1S,ITGB2,F13A1
WP	Toll-like Receptor Signaling Pathway	WP:WP75	0.02020752013219606	1.6944869798535582	101	55	6	6376	CXCL10,CCL5,CXCL9,LY96,CCL4,CD14
WP	Platelet-mediated interactions with vascular and circulating cells	WP:WP4462	0.03638991893094278	1.43901891192911	17	55	3	6376	VCAM1,CCL5,CCL2
WP	Oxidative Damage	WP:WP3941	0.03801128616694795	1.4200874351651653	41	55	4	6376	C1QA,C3AR1,C1S,C1QB
WP	Spinal Cord Injury	WP:WP2431	0.04695954122290134	1.3282761546338584	118	55	6	6376	CXCL10,VCAN,FCGR2A,CCL2,C1QB,MMP9
TF	Factor: TEF; motif: ATGTTWAYATAA; match class: 1	TF:M00672_1	0.00008290560122348503	4.081416126889108	1850	82	25	19909	CXCL10,DCN,FGL2,SRGN,CD163,SAMSN1,LUM,EPYC,TYROBP,EVI2B,UBD,EBI2,DPYD,RNASE6,CCL2,POSTN,ADAMDEC1,MNDA,RGS1,CTSK,HOPX,COL10A1,PTPRC,TDO2,ARHGDIB
TF	Factor: PARP; motif: TTTCYN; match class: 1	TF:M02027_1	0.00025304784523992894	3.5967973564559363	12322	82	72	19909	IL7R,SFRP4,VSIG4,GIMAP4,CXCL10,CLEC2B,C1QA,DCN,IL10RA,VCAN,COL11A1,FGL2,SRGN,CD163,VCAM1,C3AR1,SAMSN1,CCL5,HLA-DPB1,LUM,FCGR2A,ITGB2,EPYC,TYROBP,HLA-DRA,GLIPR1,EVI2B,SULF1,UBD,HLA-DPA1,EBI2,CXCL9,LY86,F13A1,COL5A2,DPYD,FAP,RNASE6,SERPINF1,LYZ,THBS2,LAPTM5,FCGR2B,CD53,CCL2,NNMT,ALOX5AP,POSTN,SERPINA1,C1QB,HLA-DQA1,APOC1,ADAMDEC1,GPX3,TMEM176B,HLA-DQB1,MS4A4A,CD2,CD48,MNDA,RGS1,EVI2A,CTSK,HCLS1,MS4…
TF	Factor: Oct-4; motif: YWTTSTNATGCAAAT; match class: 0	TF:M01125_0	0.00030476405447778655	3.51603625735386	1834	82	24	19909	VSIG4,CLEC2B,DCN,FGL2,SRGN,CD163,C3AR1,EPYC,HLA-DRA,EBI2,DPYD,THBS2,LY96,CCL2,POSTN,ADAMDEC1,TMEM176B,MS4A4A,CD2,TMEM176A,CD48,RGS1,COL10A1,PTPRC
TF	Factor: LHX3; motif: ATTAAW; match class: 1	TF:M02097_1	0.00035946666305182397	3.4443413798957385	6618	82	50	19909	IL7R,VSIG4,CXCL10,CLEC2B,C1QA,DCN,FGL2,SRGN,CD163,VCAM1,C3AR1,SAMSN1,CCL5,LUM,EPYC,TYROBP,HLA-DRA,GLIPR1,EVI2B,SULF1,UBD,EBI2,CXCL9,F13A1,DPYD,FAP,RNASE6,THBS2,GPNMB,FCGR2B,CCL2,POSTN,HLA-DQA1,GPX3,TMEM176B,HLA-DQB1,CD2,CD48,MNDA,RGS1,CTSK,HCLS1,MS4A6A,HOPX,COL10A1,MMP9,FCER1G,PTPRC,TDO2,ARHGDIB
TF	Factor: Oct-4; motif: ATTGWSWTGCWAAWN; match class: 1	TF:M01124_1	0.0006853138212655804	3.1641105093341513	1772	82	23	19909	IL7R,VSIG4,DCN,SRGN,CD163,SAMSN1,CCL5,LUM,HLA-DRA,EBI2,COL5A2,THBS2,ALOX5AP,GPX3,TMEM176B,CD2,CD48,MNDA,RGS1,EVI2A,COL10A1,PTPRC,TDO2
TF	Factor: BRN1; motif: HAATGCN; match class: 1	TF:M03813_1	0.0007360863639949475	3.133071227502163	7208	82	52	19909	SFRP4,CXCL10,CLEC2B,C1QA,DCN,VCAN,FGL2,SRGN,CD163,VCAM1,C3AR1,SAMSN1,LUM,FCGR2A,EPYC,HLA-DRA,EVI2B,SULF1,UBD,CXCL9,DPYD,FAP,RNASE6,LYZ,RARRES1,GPNMB,FCGR2B,CD53,LY96,CCL2,NNMT,ALOX5AP,POSTN,SERPINA1,C1QB,ADAMDEC1,GPX3,HLA-DQB1,MS4A4A,CD2,CD48,MNDA,RGS1,EVI2A,CTSK,HCLS1,MS4A6A,COL10A1,MMP9,PTPRC,TDO2,ARHGDIB
TF	Factor: TBP; motif: NGNNTATAAAA; match class: 1	TF:M03581_1	0.0011540469651133694	2.9377765167656076	1972	82	24	19909	CXCL10,CLEC2B,COL11A1,CD163,C3AR1,SAMSN1,LUM,C1S,FCGR2A,EPYC,HLA-DRA,SULF1,CXCL9,FAP,CD53,POSTN,ADAMDEC1,TMEM176B,MS4A4A,CD2,CD48,RGS1,CTSK,COL10A1
TF	Factor: CDX-2; motif: TTTATN; match class: 1	TF:M02087_1	0.0011980098154151541	2.921539623713672	5151	82	42	19909	IL7R,SFRP4,GIMAP4,CXCL10,CLEC2B,DCN,COL11A1,SRGN,CD163,VCAM1,C3AR1,SAMSN1,CCL5,LUM,FCGR2A,EPYC,EVI2B,SULF1,UBD,EBI2,FAP,LYZ,THBS2,CD53,LY96,POSTN,HLA-DQA1,ADAMDEC1,TMEM176B,HLA-DQB1,MS4A4A,CD2,CD48,MNDA,RGS1,EVI2A,CTSK,MS4A6A,CCL4,COL10A1,PTPRC,TDO2
TF	Factor: TEF-3; motif: GNTATTTTT; match class: 1	TF:M07270_1	0.0013483891254355356	2.870184758659508	4578	82	39	19909	CXCL10,CLEC2B,DCN,SRGN,CD163,VCAM1,C3AR1,SAMSN1,CCL5,LUM,C1S,FCGR2A,EPYC,HLA-DRA,GLIPR1,EVI2B,SULF1,UBD,EBI2,CXCL9,LY86,F13A1,COL5A2,DPYD,RNASE6,LAPTM5,POSTN,HLA-DQA1,ADAMDEC1,MS4A4A,CD2,EVI2A,MS4A6A,CCL4,COL10A1,FCER1G,PTPRC,TDO2,ARHGDIB
TF	Factor: FOXJ2; motif: AYMATAATATTTKN; match class: 1	TF:M00423_1	0.0016742438423380161	2.776181289670289	2806	82	29	19909	IL7R,CXCL10,CLEC2B,DCN,VCAN,FGL2,CD163,VCAM1,C3AR1,LUM,EPYC,HLA-DRA,EVI2B,SULF1,UBD,CXCL9,DPYD,FAP,LY96,POSTN,ADAMDEC1,MS4A4A,MNDA,RGS1,MS4A6A,CCL4,COL10A1,FCER1G,PTPRC
TF	Factor: SRY; motif: TCAATAMCATTGA; match class: 1	TF:M04557_1	0.0026597864847172194	2.5751532251098808	5094	82	41	19909	IL7R,VSIG4,CLEC2B,C1QA,DCN,FGL2,SRGN,CD163,VCAM1,CCL5,LUM,FCGR2A,EPYC,GLIPR1,EVI2B,SULF1,CXCL9,F13A1,COL5A2,DPYD,FAP,TGFBI,RNASE6,GPNMB,RAB31,LY96,CCL2,POSTN,HLA-DQA1,ADAMDEC1,TMEM176B,CD2,CD48,MNDA,RGS1,CTSK,HCLS1,CCL4,COL10A1,PTPRC,TDO2
TF	Factor: POU2F1:Gscl; motif: NNGATTANNTATKCANNNN; match class: 1	TF:M08404_1	0.0031211911502424116	2.505679633143897	1933	82	23	19909	IL7R,CXCL10,CLEC2B,FGL2,SAMSN1,HLA-DPB1,LUM,EPYC,TYROBP,EVI2B,HLA-DPA1,EBI2,COL5A2,FAP,POSTN,C1QB,CD2,TMEM176A,MNDA,RGS1,EVI2A,MS4A6A,TDO2
TF	Factor: Hoxa9; motif: NTTAAWTAMA; match class: 1	TF:M07457_1	0.004769367616197277	2.3215392014636302	1685	82	21	19909	GIMAP4,CLEC2B,C1QA,VCAN,CD163,C3AR1,SAMSN1,EPYC,TYROBP,EVI2B,UBD,COL5A2,GPNMB,NNMT,ALOX5AP,GPX3,HLA-DQB1,RGS1,EVI2A,COL10A1,PTPRC
TF	Factor: IRF-7; motif: AAGWGAA; match class: 1	TF:M01884_1	0.006025584762279814	2.2200007999218867	4647	82	38	19909	IL7R,SFRP4,GIMAP4,CXCL10,DCN,IL10RA,FGL2,SRGN,CD163,VCAM1,SAMSN1,FCGR2A,ITGB2,EPYC,GLIPR1,EVI2B,SULF1,UBD,EBI2,LY86,FAP,RNASE6,RARRES1,GPNMB,LAPTM5,FCGR2B,CD53,LY96,NNMT,ALOX5AP,GPX3,MS4A4A,CD2,RGS1,EVI2A,HCLS1,CCL4,ARHGDIB
TF	Factor: GSX1; motif: NNYMATTANN; match class: 1	TF:M04327_1	0.01147357931318069	1.9403010778729295	5583	82	42	19909	IL7R,GIMAP4,CXCL10,CLEC2B,C1QA,VCAN,COL11A1,FGL2,CD163,C3AR1,SAMSN1,CCL5,EPYC,HLA-DRA,GLIPR1,EVI2B,UBD,EBI2,CXCL9,LY86,DPYD,FAP,RNASE6,GPNMB,ALOX5AP,POSTN,APOC1,ADAMDEC1,GPX3,HLA-DQB1,MS4A4A,CD2,MNDA,RGS1,EVI2A,CTSK,MS4A6A,CCL4,COL10A1,MMP9,PTPRC,CD14
TF	Factor: GSX2; motif: NNYMATTANN; match class: 1	TF:M04328_1	0.015101761545613357	1.8209723914538958	3853	82	33	19909	IL7R,CXCL10,CLEC2B,C1QA,VCAN,COL11A1,FGL2,CD163,C3AR1,SAMSN1,CCL5,EPYC,GLIPR1,EVI2B,UBD,EBI2,CXCL9,RNASE6,GPNMB,ALOX5AP,POSTN,APOC1,GPX3,HLA-DQB1,MS4A4A,MNDA,RGS1,EVI2A,CTSK,MS4A6A,COL10A1,PTPRC,CD14
TF	Factor: MEF-2C; motif: TATTTWT; match class: 1	TF:M02025_1	0.02222306509884143	1.653196041537824	7956	82	52	19909	IL7R,SFRP4,VSIG4,CXCL10,CLEC2B,DCN,IL10RA,COL11A1,FGL2,SRGN,CD163,VCAM1,C3AR1,SAMSN1,CCL5,LUM,FCGR2A,EPYC,HLA-DRA,EVI2B,SULF1,CXCL9,LY86,F13A1,COL5A2,DPYD,FAP,RNASE6,SERPINF1,LYZ,GPNMB,CD53,LY96,NNMT,ALOX5AP,POSTN,HLA-DQA1,ADAMDEC1,TMEM176B,HLA-DQB1,MS4A4A,CD2,MNDA,RGS1,EVI2A,CTSK,MS4A6A,COL10A1,FCER1G,PTPRC,TDO2,ARHGDIB
TF	Factor: CDP:HOXA13; motif: ATCGATYAYSYCRTAAA; match class: 1	TF:M08201_1	0.025844721876024594	1.5876281370640102	3213	82	29	19909	IL7R,VSIG4,CXCL10,CLEC2B,DCN,FGL2,VCAM1,C3AR1,SAMSN1,CCL5,LUM,C1S,EPYC,HLA-DRA,EVI2B,SULF1,UBD,EBI2,COL5A2,DPYD,THBS2,POSTN,HLA-DQA1,ADAMDEC1,CD2,MNDA,HCLS1,COL10A1,PTPRC
TF	Factor: CDP; motif: CCAATAATCGAT; match class: 1	TF:M00095_1	0.026374771602667043	1.578811292533336	3039	82	28	19909	VSIG4,CXCL10,CLEC2B,VCAM1,C3AR1,SAMSN1,CCL5,LUM,EPYC,EVI2B,SULF1,CXCL9,LY86,FAP,RNASE6,THBS2,FCGR2B,CD53,POSTN,C1QB,HLA-DQA1,ADAMDEC1,GPX3,RGS1,CCL4,COL10A1,PTPRC,ARHGDIB
TF	Factor: GATA-4; motif: AGATAAN; match class: 0	TF:M03549_0	0.027278494779188277	1.5641795976199575	3959	82	33	19909	SFRP4,CXCL10,CLEC2B,C1QA,DCN,IL10RA,COL11A1,FGL2,VCAM1,C3AR1,LUM,FCGR2A,EPYC,EVI2B,EBI2,F13A1,COL5A2,LYZ,THBS2,CD53,LY96,CCL2,NNMT,POSTN,ADAMDEC1,TMEM176B,CD2,CD48,MNDA,RGS1,HCLS1,MS4A6A,FCER1G
TF	Factor: Pit-1; motif: NMTTCATAAWTATWNMNA; match class: 1	TF:M00802_1	0.030461194344971364	1.5162530725278265	1174	82	16	19909	VSIG4,C1QA,CD163,CCL5,EPYC,CXCL9,THBS2,FCGR2B,ALOX5AP,ADAMDEC1,MNDA,RGS1,EVI2A,CTSK,HCLS1,MS4A6A
TF	Factor: JUNB:C-JUN; motif: NATGACKCAT; match class: 1	TF:M08944_1	0.045339350451136996	1.3435247060336661	948	82	14	19909	IL7R,GIMAP4,CLEC2B,DCN,FGL2,SRGN,CCL5,EBI2,CCL2,NNMT,POSTN,ADAMDEC1,MMP9,ARHGDIB
CORUM	C1q complex	CORUM:6418	0.025051056150253298	1.6011739595948205	3	14	2	3620	C1QA,C1QB
